# Supplementary material for: Srf destabilizes cellular identity by suppressing cell-type-specific gene expression programs
Source: PubMed Central journal article supplement (PMC5895821; doi:10.1038/s41467-018-03748-1), 2018-04-11
Supplement: 41467_2018_3748_MOESM2_ESM.pdf [file 41467_2018_3748_MOESM2_ESM.pdf]

## **Description of Additional Supplementary Files**

**File Name:** Supplementary Data 1

**Description:** shRNA targets enriched in the screenings of NPCs

**File Name:** Supplementary Data 2

**Description:** shRNA targets enriched in the screening of hepatoblasts

**File Name:** Supplementary Data 3

**Description:** Overlapped shRNA targets among the screenings of MEFs, NPCs and hepatoblasts
